# Supplementary material
Source: Springer Nature journal article supplement (https://www.springermedizin.de/resource/supplementary/12888_2010_878_MOESM2_ESM.pdf/9478434)
Supplement: MOESM2 [file 9478434]

# Neurological soft signs in people with schizophrenia, their relatives and normal controls

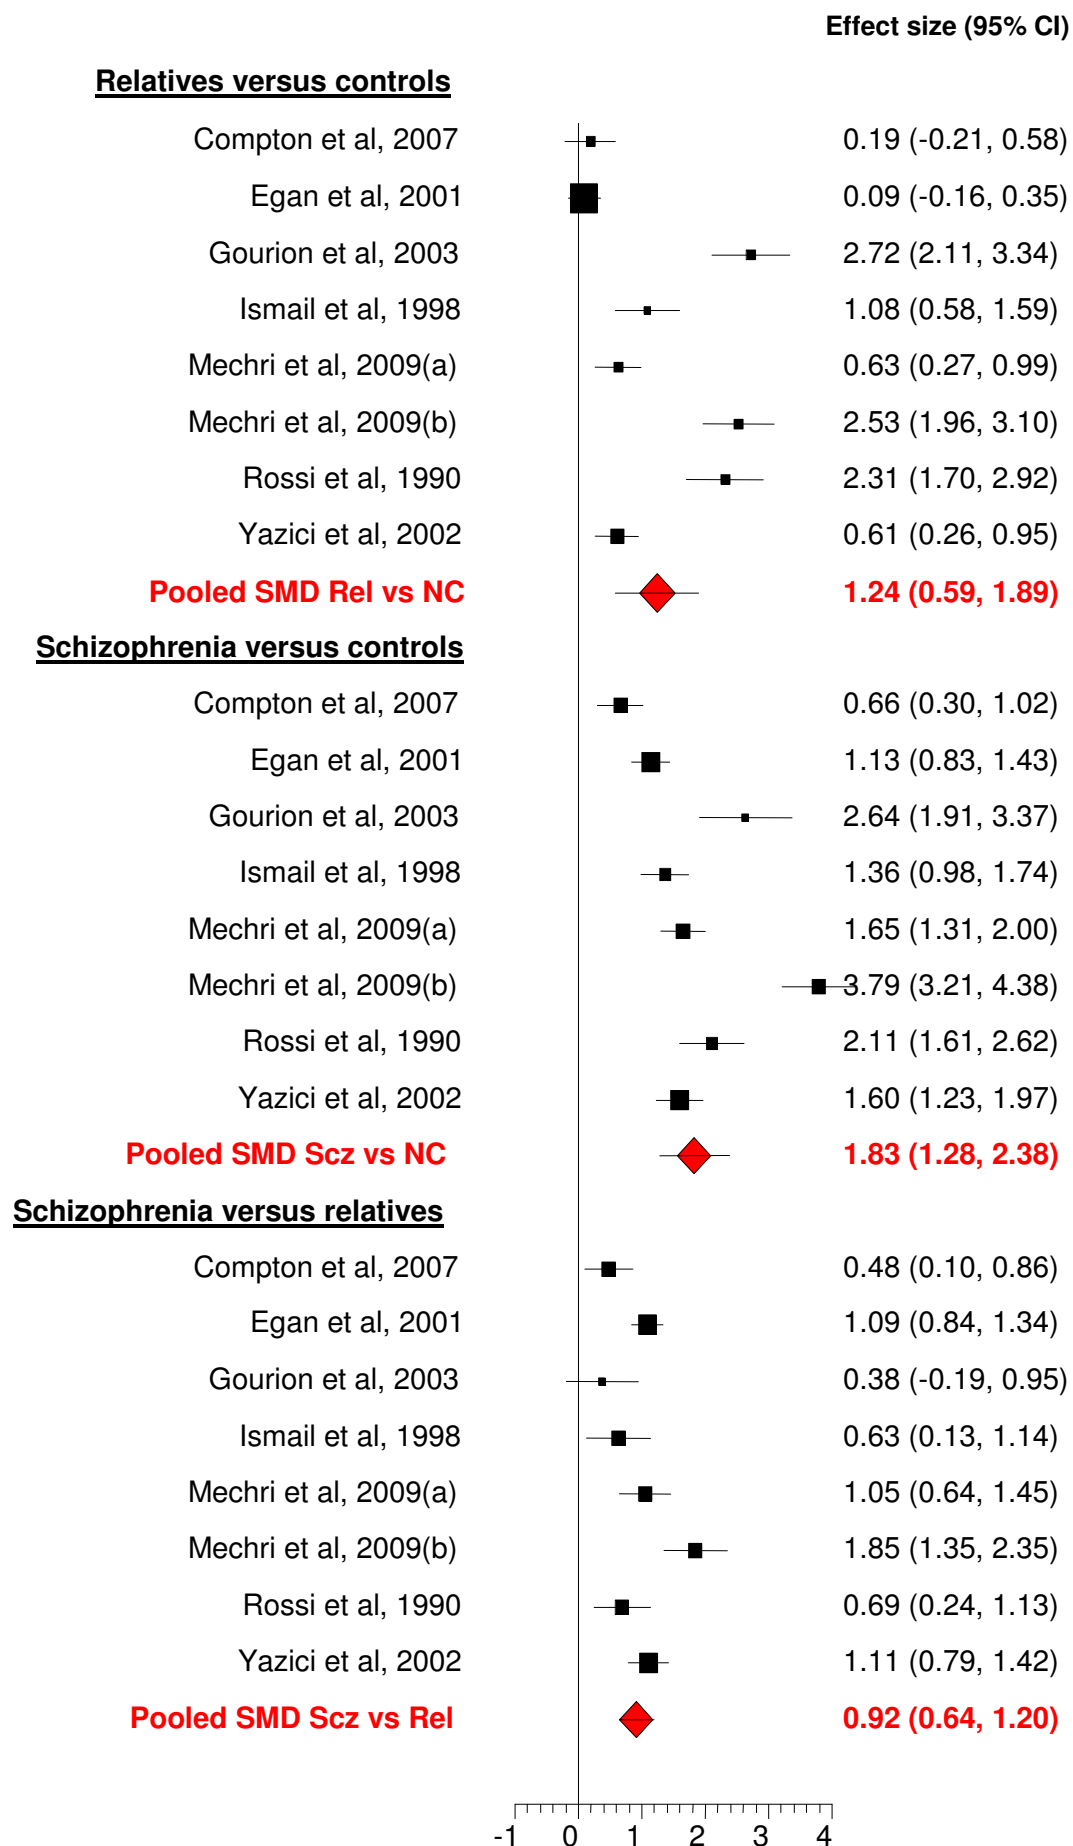

Diamonds indicate pooled effect size; line across diamond indicates 95% confidence interval-CI, Rel – relatives, Scz – schizophrenia, NC – normal controls, SMD – standardised mean difference.
